# Supplementary material
Source: PubMed Central journal article supplement (PMC5516930)

## Supplementary Figure Legends

**Figure S1. EGFR inhibition or stimulation affects normal and catalytically inactive fusion oncogene signaling.** **A**, CUTO-3 **B**, LC-2/ad, **C**, HCC78 cells, and **D**, H3122 cells were treated for 3 hours with vehicle control (DMSO), a cognate fusion kinase inhibitor: 100nM ARRY-470 (TRKA), 250 nM foretinib (RET), 250 nM TAE-684 (ROS1), or 500 nM crizotinib (ALK), 1  $\mu$ M gefitinib, or the combination of FKI and gefitinib, in the absence or presence of 30 minutes of 100ng/mL EGF stimulation. Immunoblot analysis was performed using the antibodies indicated. Phospho-antibodies to Y1068 and Y1173 or 4G10 were used for pEGFR, S473 for pAKT, T202 and Y202 for pERK, Y496 Y680/681 for pTRKA, and 4G10 for pROS1, pRET, and pALK. **E**, EGFR and FLAG-tagged catalytically inactive CD74-TRKA (K544M) or an empty-PCDH vector cDNA were transiently expressed in 293T cells for 24 hours and treated with DMSO vehicle, stimulated with 100 ng/mL EGF for 60 minutes, or with 1  $\mu$ M gefitinib for 2 hours. Immunoblotted lysates from the experiment were probed for phospho-TRKA at Y496, and Y680/481 or FLAG and EGFR antibodies.  $n = 3$ .

**Figure S2. EGFR knockdown reduces fusion kinase cancer cell proliferation.** **A**, Knockdown of EGFR was performed by stable expression of two different shRNA constructs against *EGFR* or non-targeting control (NTC) shRNA vector (PLKO) in CUTO-3 cells followed by immunoblot analysis with pEGFR, EGFR, and Tubulin antibodies.  $n = 3$  **B**, Measurement of cell proliferation by MTS of CUTO-3 cells expressing NTC or two different shRNA constructs against EGFR. **C**, Knockdown of EGFR was performed by stable expression of two different shRNA constructs against *EGFR* or non-targeting control (NTC) shRNA vector (PLKO) in LC-2/ad cells followed by immunoblot analysis using pEGFR, EGFR, and Tubulin antibodies.  $n = 3$ . **D**, Measurement of cell proliferation by MTS of LC-2/ad expressing NTC or two different shRNA constructs against EGFR as in **B**.

**Figure S3. Conserved re-phosphorylated activation loop tyrosines enabled signaling PLA design and representative image analyses of fusion kinase and EGFR signaling PLAs.** **A**, Immunoblot analysis of CUTO-3 cells using an antibody against Y480/481 after inhibition with the TRK inhibitor ARRY-470 at 100 nM, the combination of the FKI with 1  $\mu$ m gefitinib, with and without 10 ng/mL EGF stimulation. Immunoblot analysis of LC-2/ad cells treated with 250 nM foretinib, the combination of the FKI with 1  $\mu$ m gefitinib, with and without 100 ng/mL EGF stimulation. The blot was probed using an anti-pRET Y905 antibody. Immunoblot analysis of H3122 cells using the anti-pALK Y1278/82/83 antibody. Cells were treated with crizotinib, the combination of the FKI with 1  $\mu$ m gefitinib, in the presence or absence of 10 ng/mL EGF to demonstrate which ALK tyrosine residues were being phosphorylated. Representative blot images are shown. *n* = 3. **B** Protein amino acid alignment performed using PROMALS software (<http://prodata.swmed.edu/promals/promals.php>) for TRKA, RET, ALK, and ROS1 kinase domains. Y905 of RET, Y480/481 of TRKA, and Y1282/83 of ALK are the conserved activation loop tyrosines for each kinase, shown in red for each. No phosphotyrosine-specific antibody was available for ROS1 at Y2115 and/or Y2116, but ROS1 is shown for comparison. **C**, Representative images from fusion kinase-adaptor PLAs in the indicated cell lines: TRKA-SHC1 (CUTO-3; FKI = 100 nM AR470), RET-GRB7 (LC-2/ad; FKI = 250 nM foretinib), and ALK-GRB2 (H3122 and STE-1; FKI=250 nM crizotinib) were treated with DMSO, FKI, FKI + 20 minute stimulation with 100 ng/ML EGF, or FKI + 1  $\mu$ m gefitinib + EGF. **D**, Representative images from EGFR-GRB2 PLAS in the same cell lines and with the same treatment conditions as described in (A). *n* = 3. Scale bars shown represent approximately 50 microns.

**Figure S4. Optimization of the EGFR-GRB2 PLA and fusion kinase PLA antibody controls.** Demonstration of the specificity of the EGFR-GRB2 PLA **A**, Representative images of H1650 NSCLC cell line that express the EGFR activating mutation deletion exon 19

(delE746A-750) treated with DMSO or treated with 1  $\mu$ M gefitinib. **B**, H1650 cells were treated with a dose range of gefitinib to demonstrate a corresponding linear reduction in EGFR-GRB2 signaling complexes, and a significant reduction with the maximal dose, and  $P$  values were calculated using a paired student's t test. \*  $p < 0.05$ . Data is expressed as the mean  $\pm$  the SEM.  $n = 3$ . **C**, H520 lung squamous cell line that does not express detectable levels of EGFR had no PLA signal.  $n = 3$ . Scale bars shown represent approximately 50 microns.

**Figure S5. The GRB2 adaptor does not switch from ROS1 to MET with FKI treatment, but MET can signal through GRB2.** **A**, A MET-GRB2 PLA was performed following treatment of the HCC78 ROS1+ cells with the FKI to demonstrate that the signaling increase of EGFR-GRB2 was unique, and not observed for all RTKs. Representative images are shown.  $n = 3$ . **B**, Quantification of PLA analysis described in A. Changes in MET-GRB2 signaling complexes were not significant by a student's paired t-test. **C**, Representative images demonstrating MET-GRB2 signaling PLA in a *MET* gene amplified NSCLC cell line, H1993, with and without 250 nM treatment of the MET inhibitor crizotinib.  $n = 3$ . **D**, Quantification of PLA analysis described in B. \* indicates  $p < 0.05$ , \*\*  $p < 0.01$ . Representative images of immunoblot analysis are shown. All data is expressed as the mean  $\pm$  the SEM. All  $P$  values were calculated using a paired student's t test.  $n = 3$ . Scale bars shown represent approximately 50 microns.

**Figure S6. GRB2 and SHC1 signaling rewire in a RET+ cell line treated with a fusion kinase inhibitor (FKI).** **A**, and **B**, Time course of FKI treatment in LC-2/ad *RET*+ cells fixed at the indicated timepoints, and assayed by RET-GRB2, EGFR-GRB2, RET-SHC1, or EGFR-SHC1 PLAs. FKI= 250 nM foretinib. Representative images are shown.  $n = 3$ . **C**, and **D**, Quantification of experiments described in **A** and **B**. Data is expressed as the mean  $\pm$  the SEM.  $P$  values were calculated using a paired student's t test \* indicates  $p < 0.05$ , \*\*  $p < 0.01$ , \*\*\*  $p < 0.005$ . **E**, RET or EGFR was immunoprecipitated from LC-2/ad cells followed by immunoblot

analysis using anti- RET, EGFR, GRB2, or SHC1 antibodies after treatment with vehicle (DMSO) or FKI; 250 nM foretinib for 3 hours. Scale bars shown represent approximately 50 microns.

**Figure S7. TRK, RET, ROS1 and ALK fusion kinases interact specifically with EGFR.** **A**, Immunoprecipitation of TRKA was performed in CUTO-3 cells following treatment for 3 hours of vehicle control (DMSO), 100nM ARRY-470, 1  $\mu$ M of gefitinib, the combination, and in the absence or presence of 20 minutes stimulation with 10 ng/mL EGF. Corresponding immunoblot analysis of TRKA and EGFR is shown, including analysis of lysates from the same immunoprecipitation experiment,  $n = 3$ . **B**, Immunoprecipitation of EML4-ALK with EGFR using an anti-EGFR antibody under basal, FKI, FKI + 20 minutes of 10 ng/mL EGF, and FKI + 1  $\mu$ M gefitinib + EGF in H3122 cells (FKI = 250 nM crizotinib). **C**, SLC34A2-ROS1 and EGFR in HCC78 cells, (FKI = 250 nM TAE-684) and **D**, CCDC6-RET and EGFR in LC-2/ad cells (FKI = 250 nM foretinib). Representative immunoblot and corresponding cell lysate images are shown.  $n = 3$ . **E**, EGFR, RIP-TRKA-HA, or empty-vector (EV) cDNA were transiently expressed in 293T cells for 24 hours and treated for 3 hours of vehicle control (DMSO), 100nM of ARRY-470, 1  $\mu$ M of gefitinib, the combination, and in the absence or presence of stimulation with 10ng/mL EGF. Lysates were immunoprecipitated using an anti-HA antibody. Immunoblotted lysates from the same experiment are shown,  $n = 3$ . **F**, Immunoprecipitation of ALK in 293T cells expressing an empty PCDH vector, EML4-ALK and EGFR followed by immunoblot analysis with ALK and EGFR antibodies under unstimulated conditions (DMSO) or treatment with both 250nM crizotinib and 10ng/mL EGF. **G**, Immunoprecipitation of ROS1 in 293T cells expressing empty vector, SDC4-ROS1 and EGFR followed by immunoblot analysis with ROS1 and EGFR antibodies under unstimulated conditions or treatment with both 250nM TAE-684 and 10ng/mL EGF. **H**, Reciprocal immunoprecipitation of EGFR in 293T cells expressing empty vector, EGFR and ALK or ROS1 followed by immunoblot analysis with anti-EGFR and ALK or ROS1

antibodies under unstimulated conditions or treatment with both 250nM crizotinib and 10ng/mL EGF. Pre-immunoprecipitation lysates are shown below each panel. Empty vector (EV) or EGFR expression alone in 293T cells are shown as negative controls. Representative images are shown,  $n = 2$ . **I**, Immunoprecipitation of FGFR1 in 293T cells co-transfected with FGFR1 and SDC4-ROS1 cDNAs followed by immunoblot with anti-FGFR1 or ROS1 antibodies under unstimulated (DMSO) or 200 nM TAE-684 plus 10 ng/mL FGF2 conditions. **J**, Reciprocal immunoprecipitation against ROS1 was also negative under the same conditions as shown in **I**. Pre-immunoprecipitation lysates are shown below each panel. Empty vector (EV) transfection is shown as a negative control. Representative images are shown,  $n = 2$ . **K**, Proximity ligation assays were used to further assess potential protein-protein interactions between TRKA, RET, ALK, and ROS1 fusion kinases and EGFR endogenously in CUTO-3, LC-2/ad, H3122, and HCC78 cells lines, respectively. Representative images are shown. Scale bars shown represent approximately 50 microns.  $n = 3$ . **L**, PLA assays were used to demonstrate antibody and corresponding PLA specificity. The TRKA and ALK fusion proteins did not form complexes with another abundant class of proteins, cytokeratins (a pan-cytokeratin antibody was utilized), using a TRK- or ALK-cytokeratin PLA in CUTO-3 and H3122 cells. The green channel was included in merged pictures to demonstrate functionality of the cytokeratin antibody. **M**, EGFR-fusion kinase PLA complexes for RET, ROS1, TRKA and ALK were not detected in cell lines that do not express the appropriate fusion kinase, indicating the antibodies do not cross-react with other kinases.  $n = 3$ .

**Figure S8. EGFR is highly expressed, phosphorylated, and signaling *in vivo* in an *NTRK1*+ patient-derived xenograft (PDX) model.** **A**, Images of F1 generation flank tumors from *NTRK1*+ PDX in a nude mouse. **B**, 100x FISH images for specimen CULC 001 (*NTRK1*+) F1 Spleen metastases showing nuclei with single 3'*NTRK1* (red arrows), single 5'*NTRK1* (green arrows) and split 3'*NTRK1* and 5'*NTRK1* signals (yellow arrows.) **C**, 100x

immunohistochemistry analysis of *NTRK1* PDX spleen metastatic tumors showing H&E, human total EGFR, or Y1068 for pEGFR staining. **D**, and **G**, TRKA-SHC1, **E**, and **H**, EGFR-GRB2, and **F**, and **I**, TRKA-EGFR PLAs were performed on F3 generation FFPE tumor tissue from either the *NTRK1*(+) PDX CULC-001 mouse model **A-C**, or an *NTRK1*(-) PDX CULC-002 model **D-F**.

**Figure S9. Fusion kinase, and EGFR signaling complexes are present in *RET*, and *ALK*, fusion resistant patient samples.** **A**, Vertical scatter plot analysis of H-score quantification of EGFR immunohistochemical analysis of 26 *ALK*+ and *ROS1*+ NSCLC patients. The line represents the median of the scores. EGFR IHC grading by H score is standardized, and occurs on a scale of 0 to 300 based on the number of tumor cell membranes that are positive. **B**, FFPE tumor samples from 1 *RET*+ patient taken 3 days after treatment with the FKI ponatinib **C – E**, FFPE tumor samples from 3 different *ALK*+ patients post treatment with the FKI crizotinib were also assessed by *ALK* and EGFR PLAs. **F**, *ALK*-GRB2 and EGFR-GRB2 analysis in primary lung and metastatic brain lesions in a crizotinib resistant *ALK*+ patient. **G**, FFPE tumor samples from *RET*+ and *ALK*+ patients were used as negative controls to show specificity of each fusion kinase-adaptor assay in different patient samples positive for a different fusion kinase. No PLA cross-reactivity was detected in any of the indicated samples. Scale bars shown represent approximately 50 microns.

## Supplementary Table Legends

**Table S1. Cell lines and inhibitors used in this study.**

**Table S2. EGFR significantly contributes to cellular proliferation in fusion kinase positive cell lines.** IC<sub>50</sub> values and statistical analysis for proliferation assays in Figure 5 are shown.

Assays performed across all 9 cell lines were pooled and analyzed collectively for statistical analysis. *P* values were calculated using a paired student's t test with an N of 9.





**A**

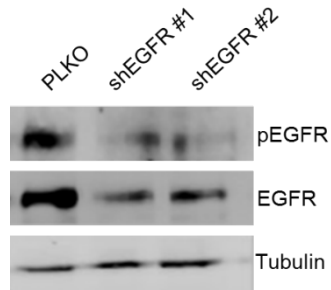

**B**

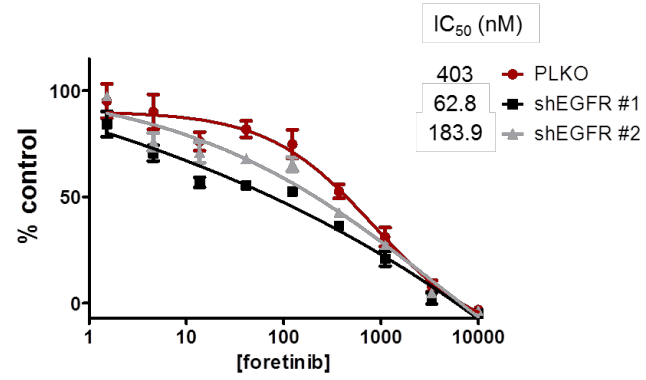

**C**

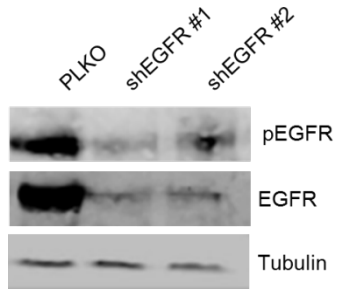

**D**

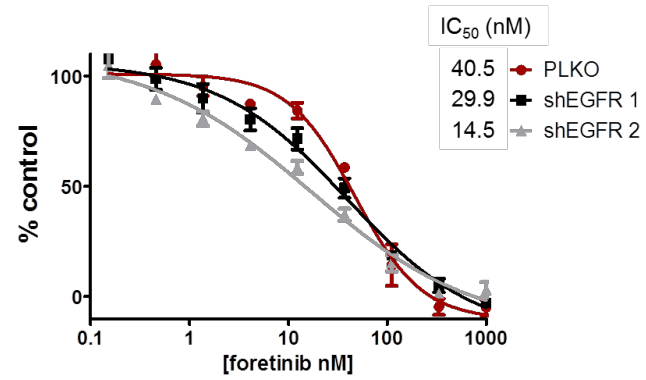

## A

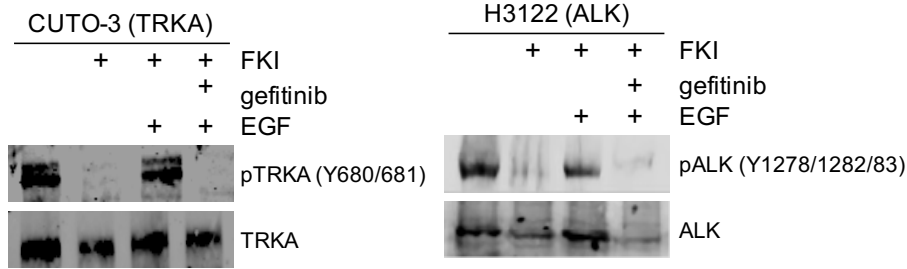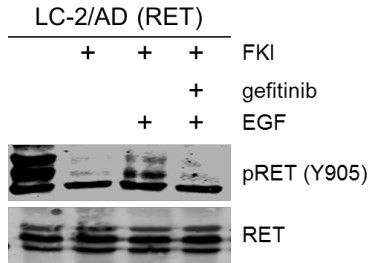

## B

|                  |                                        |
|------------------|----------------------------------------|
| TRKA (666-693)   | IGDFGMSRDIYSTD <b>YY</b> RVGGRTMLPIRW  |
| RET (890-917)    | GRKMKISDFGLSRDV <b>YE</b> EEDSYVKRSQGR |
| ALK (1268-1293)  | IGDFGMARDIYRAS <b>YY</b> RKGGCAMLVVKW  |
| ROS1 (2100-2127) | IGDFGLARDIYKND <b>YY</b> RKRGEGLLPVRW  |

## C

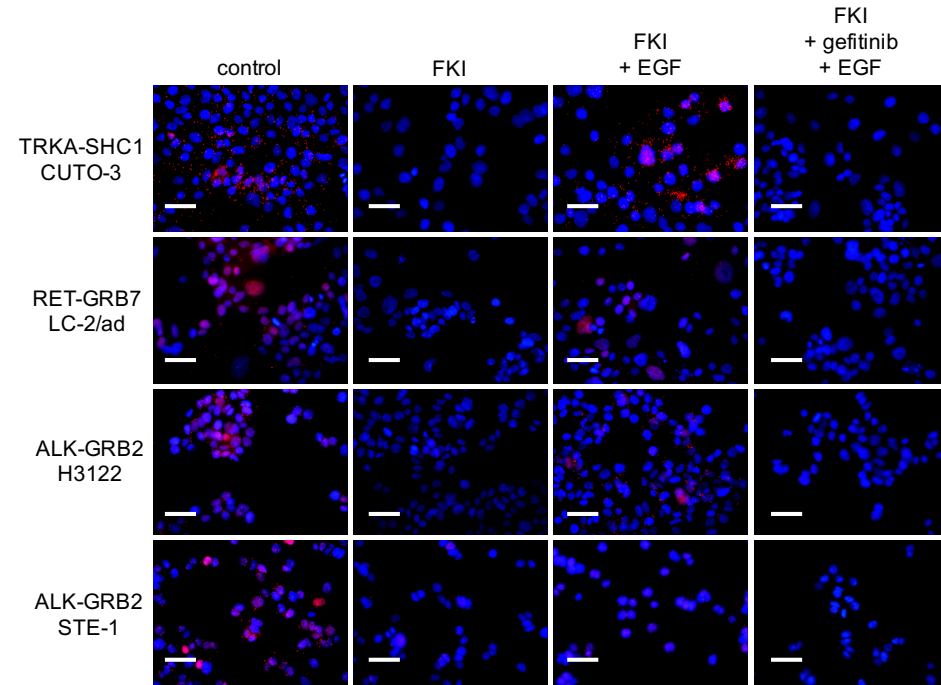

## D

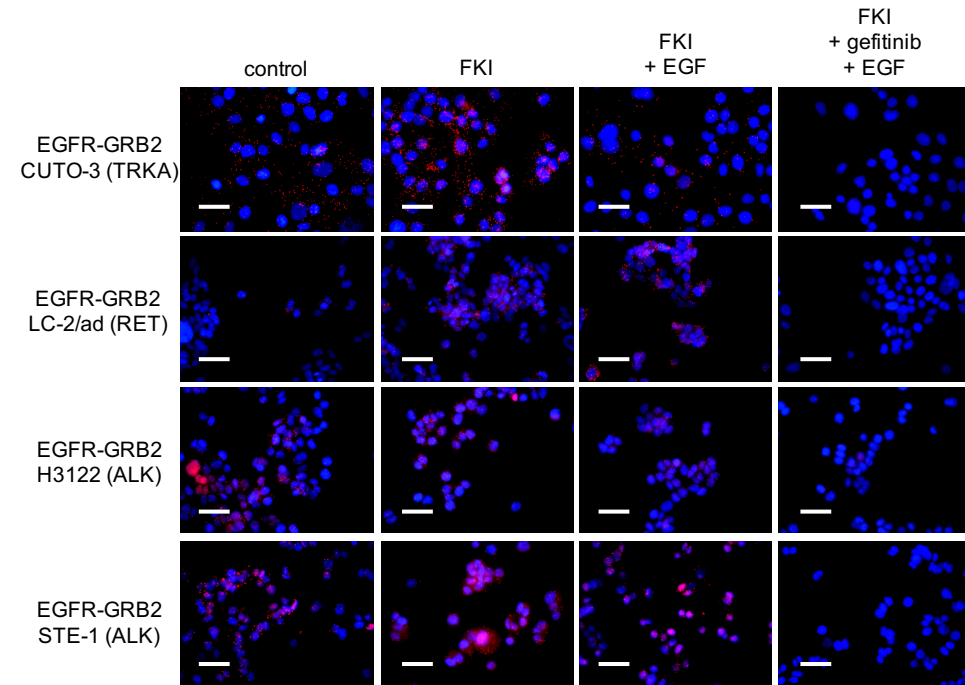

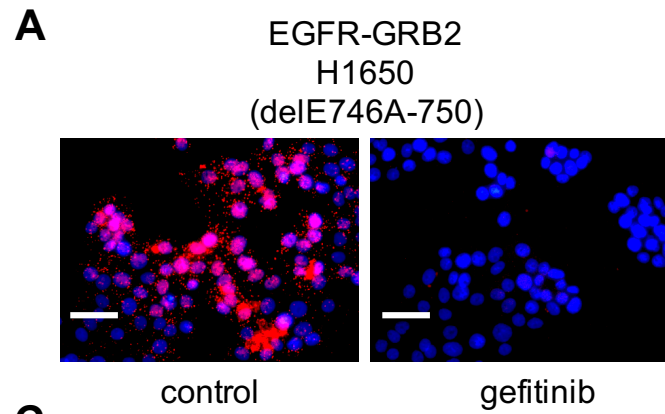

**C**

EGFR-GRB2  
H520

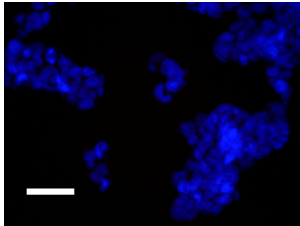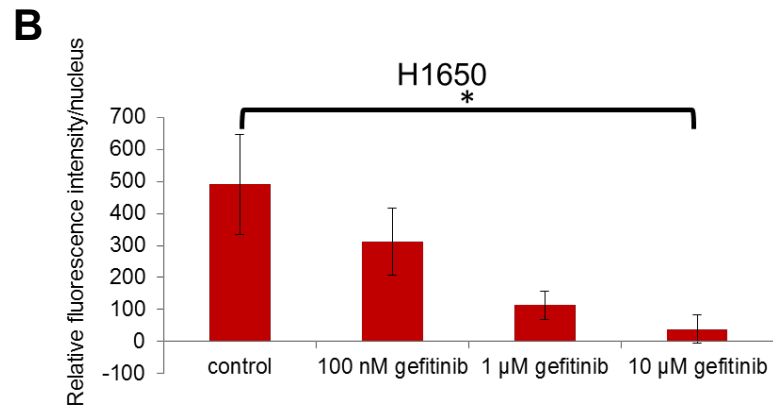

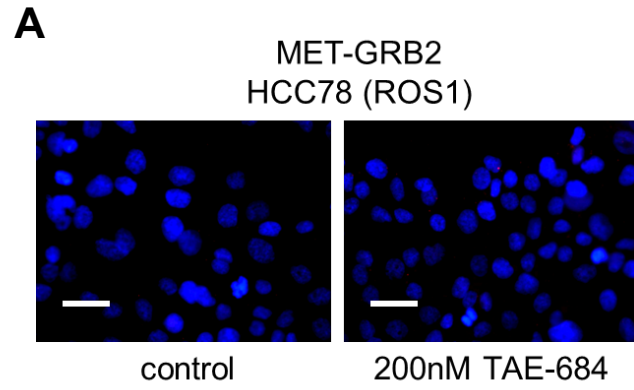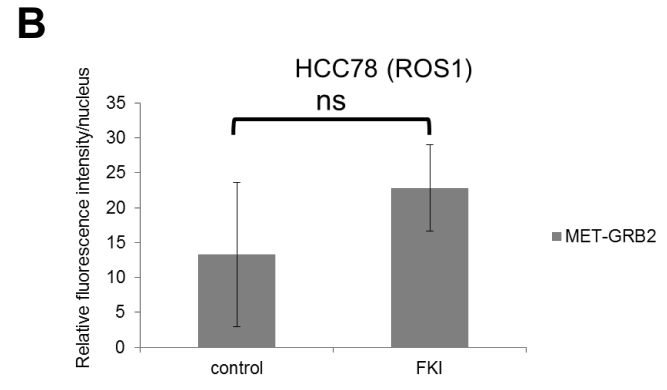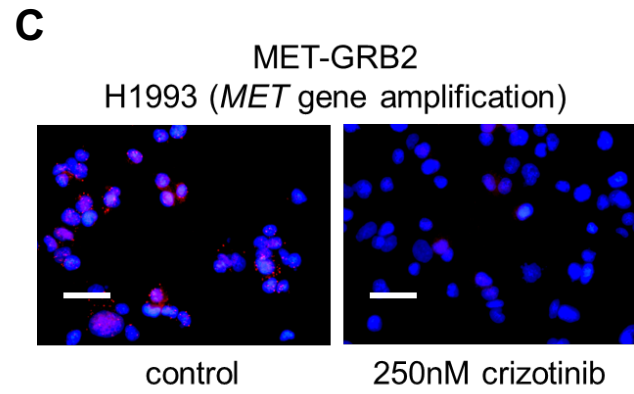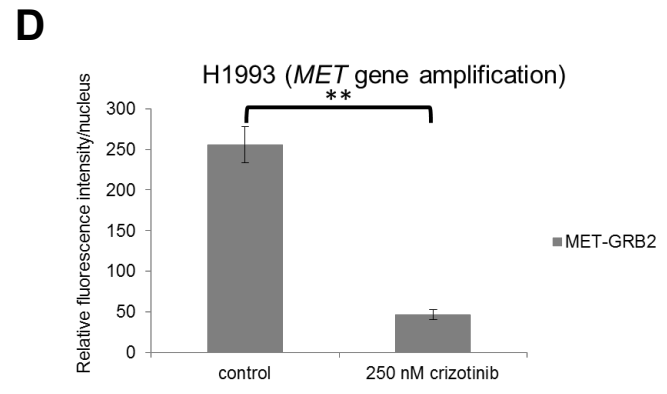

# Supplementary Figure 6

## A

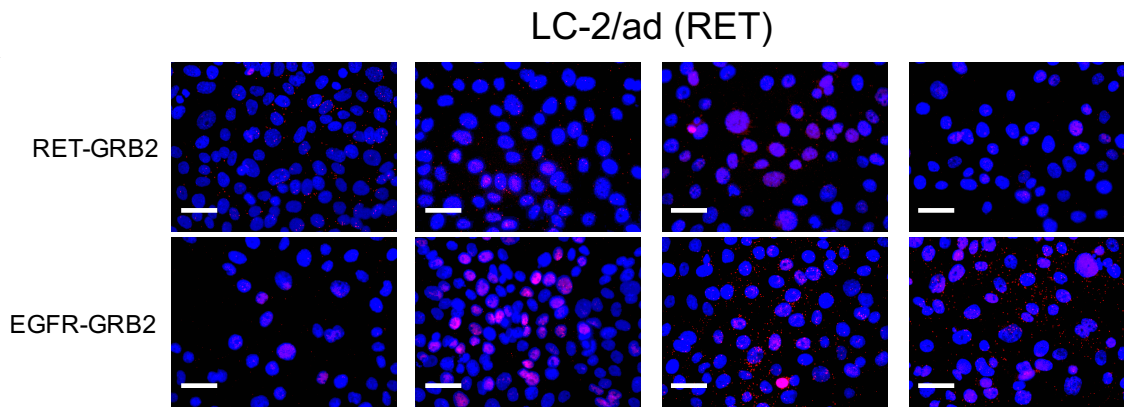

## E

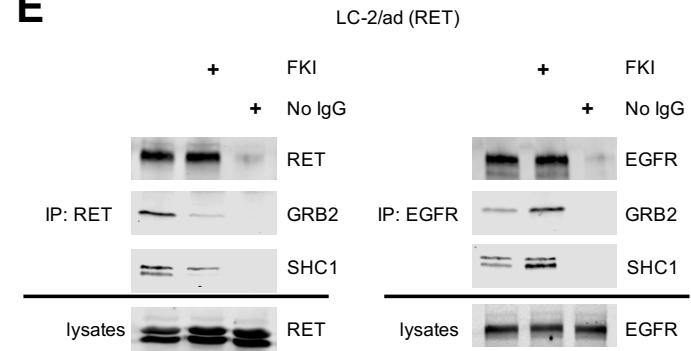

## B

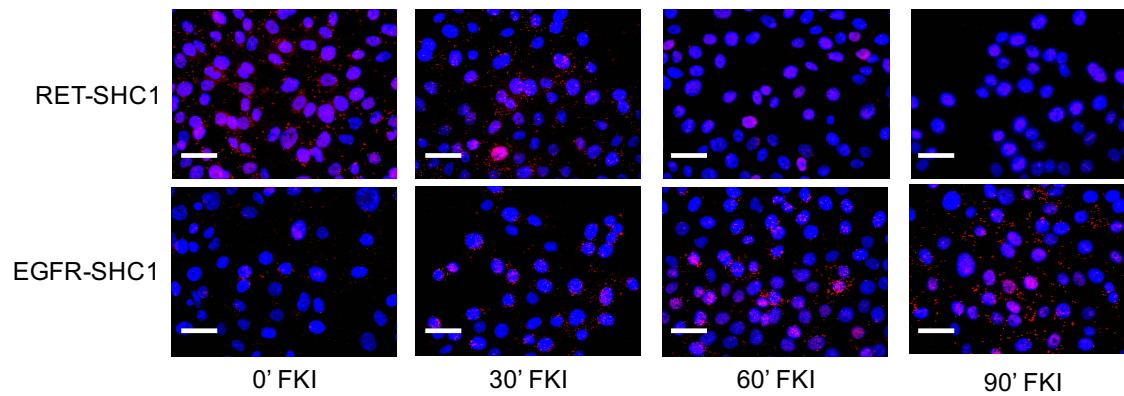

## C

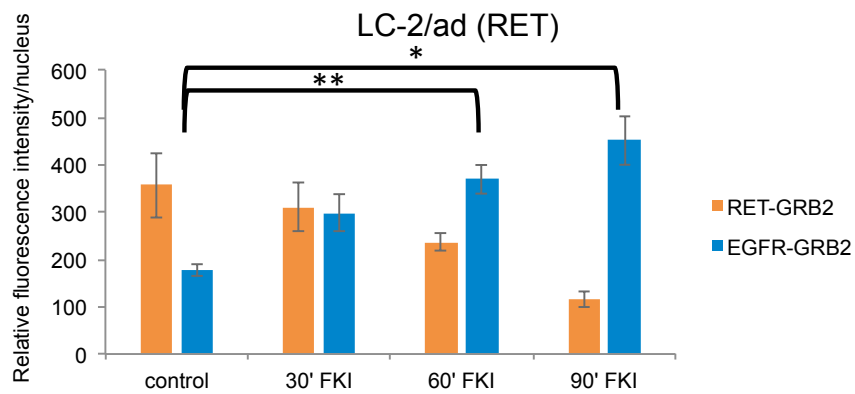

## D

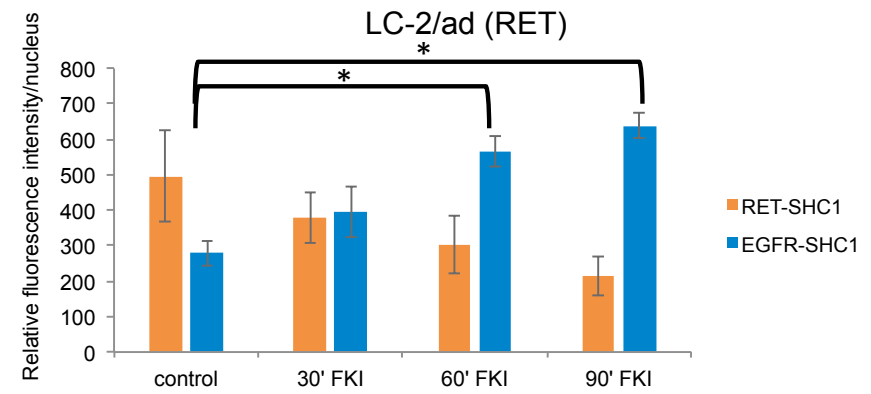

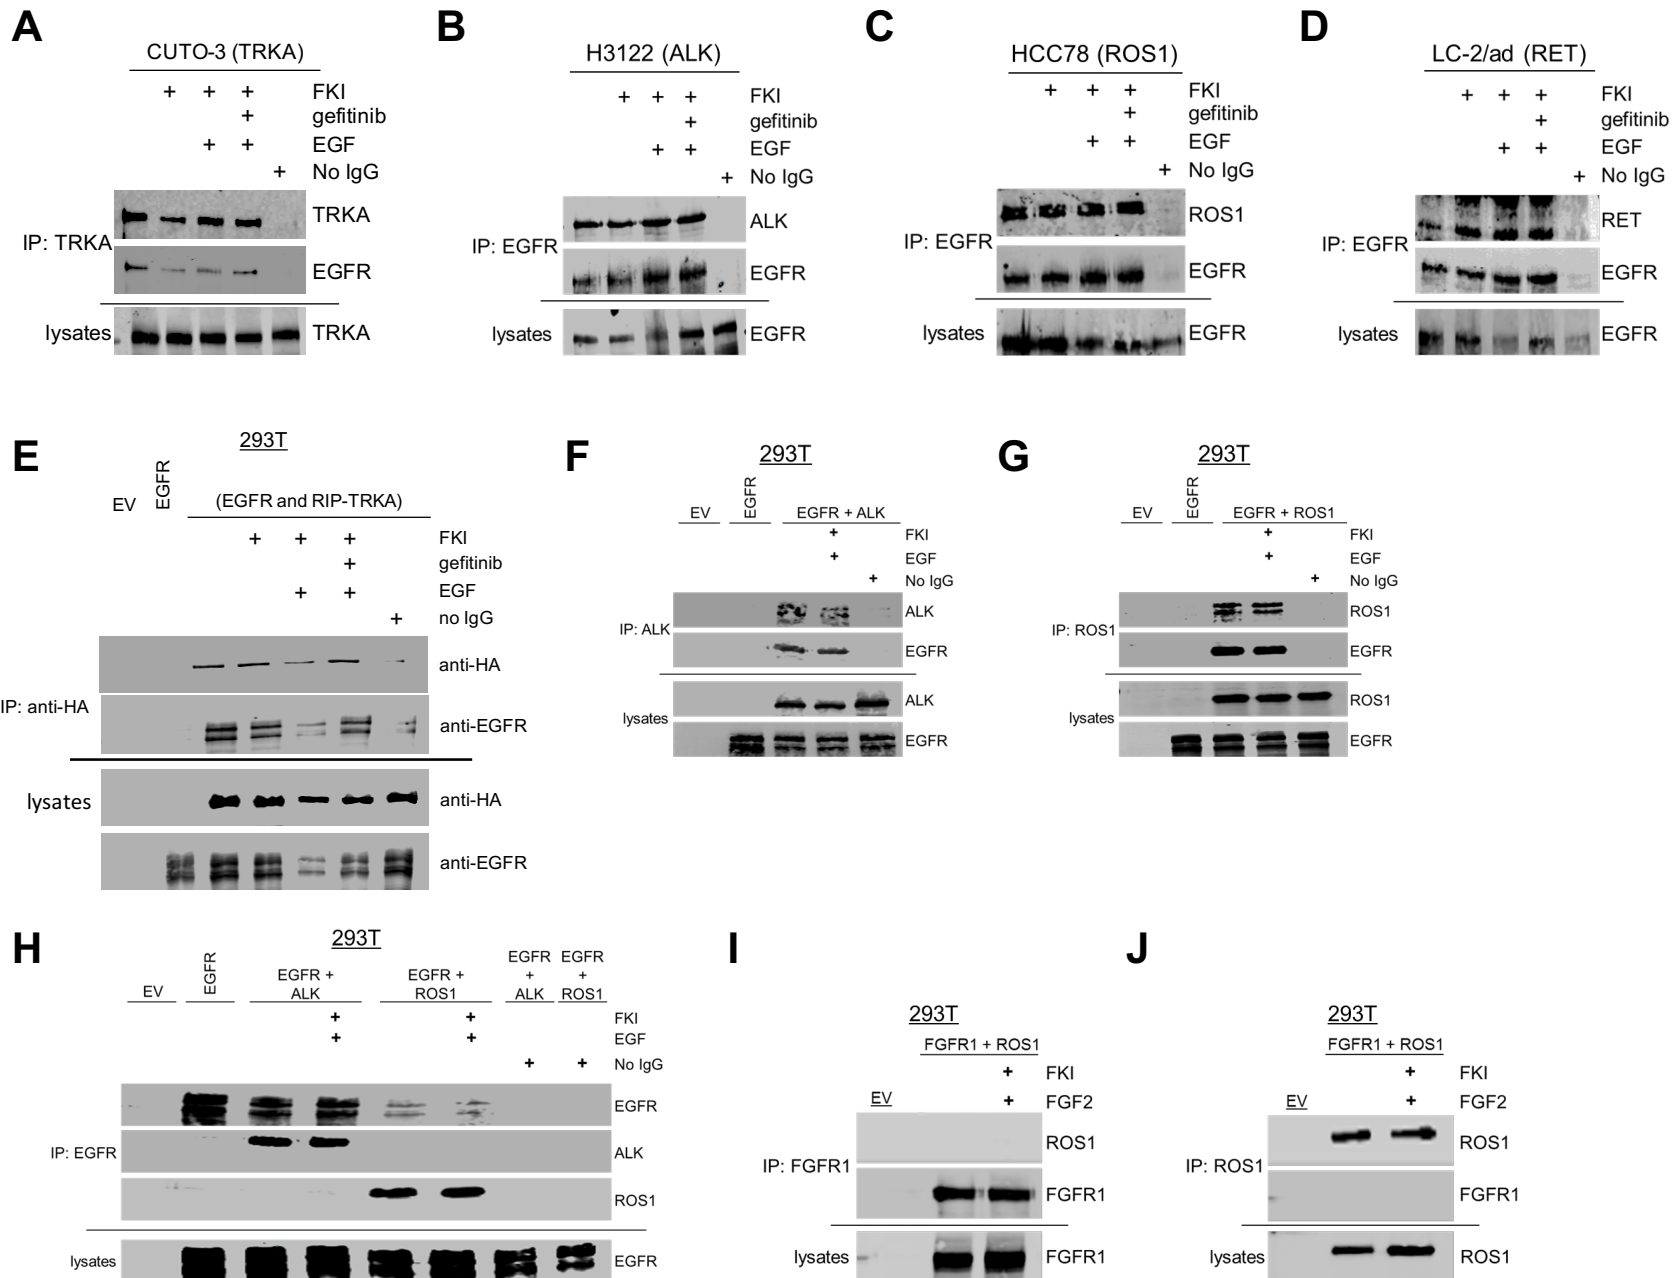

**K**

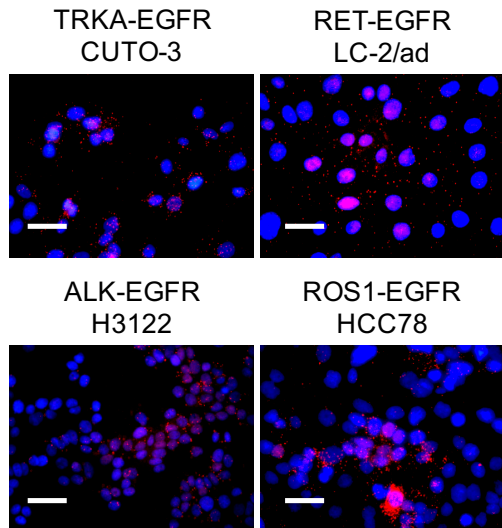

**L**

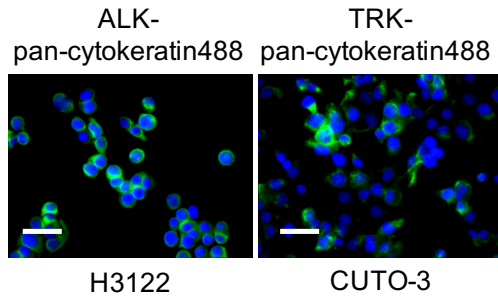

**M**

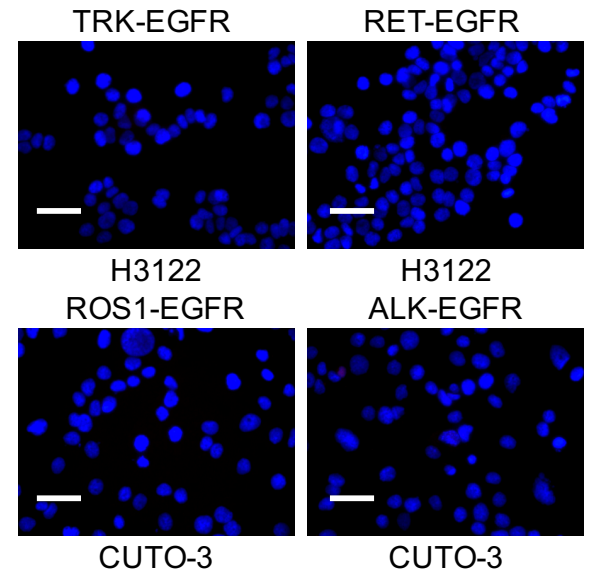

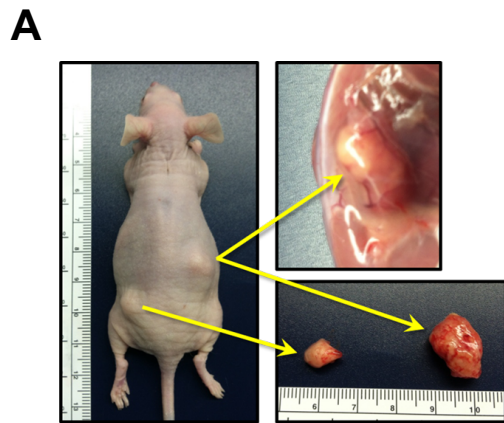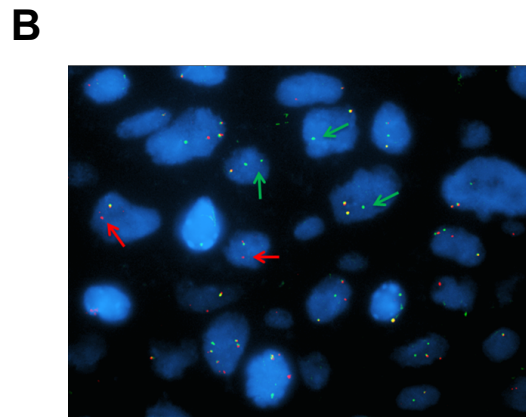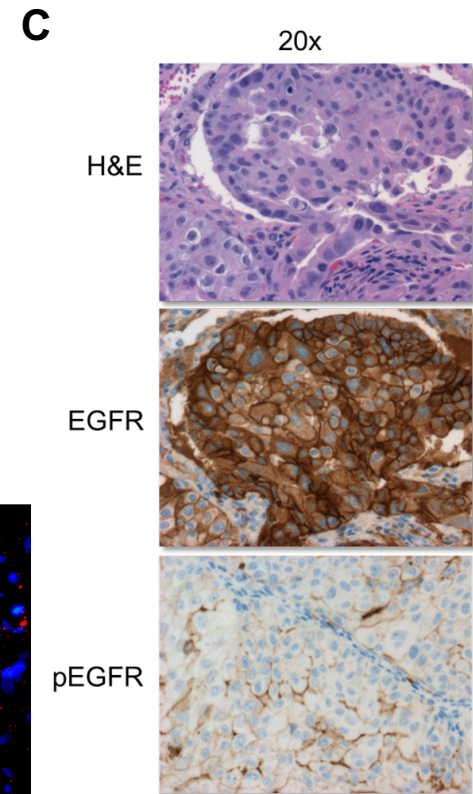

TRK-SHC1

EGFR-GRB2

TRK-EGFR

CULC-001  
(MPRIP-  
NTRK1+)

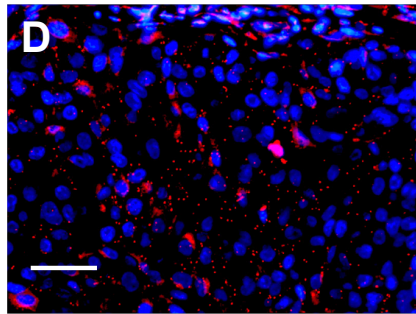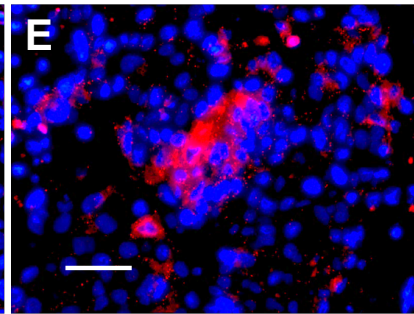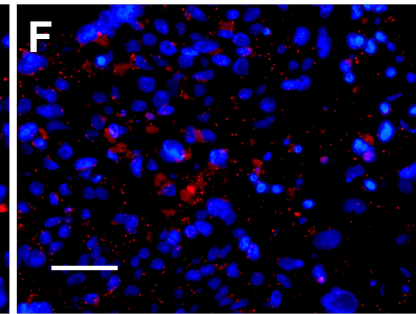

CULC-002  
(NTRK1-)

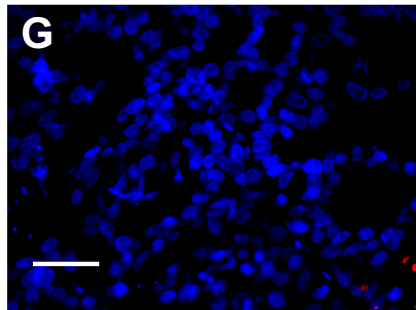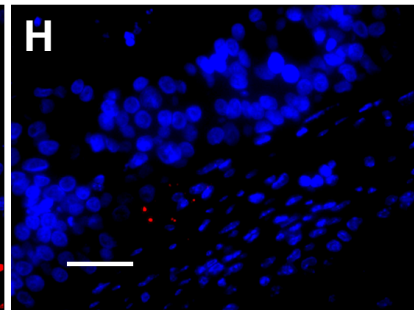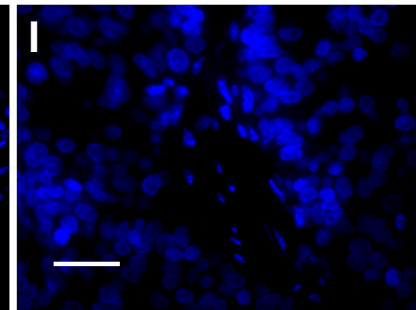



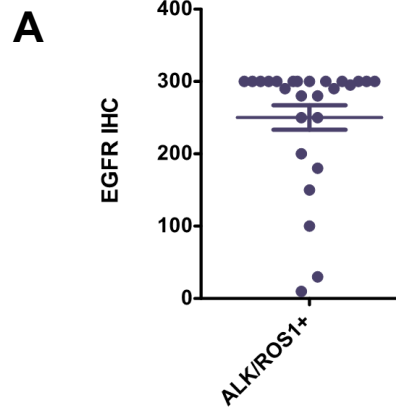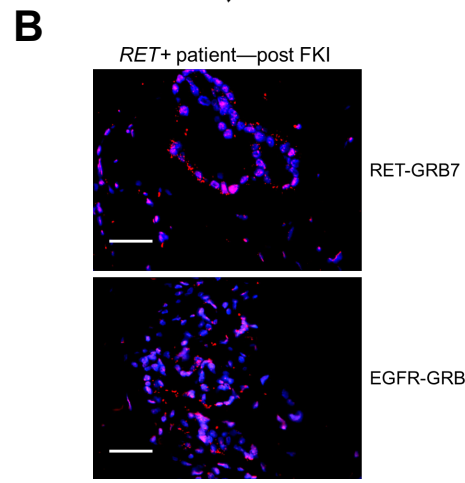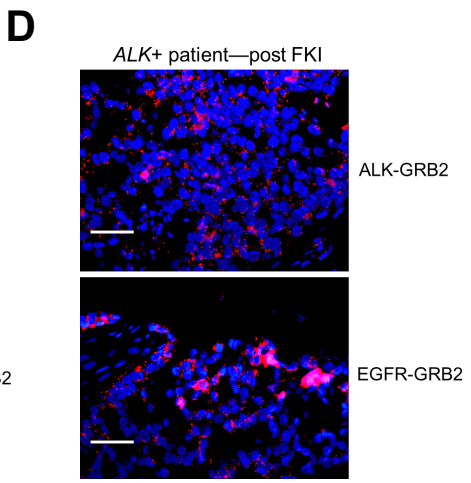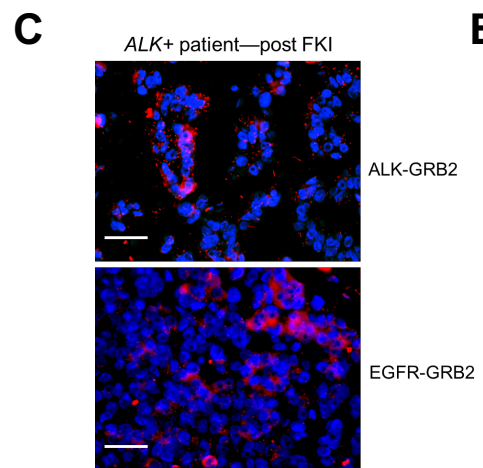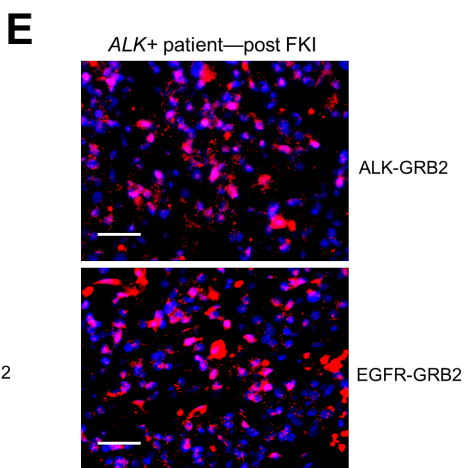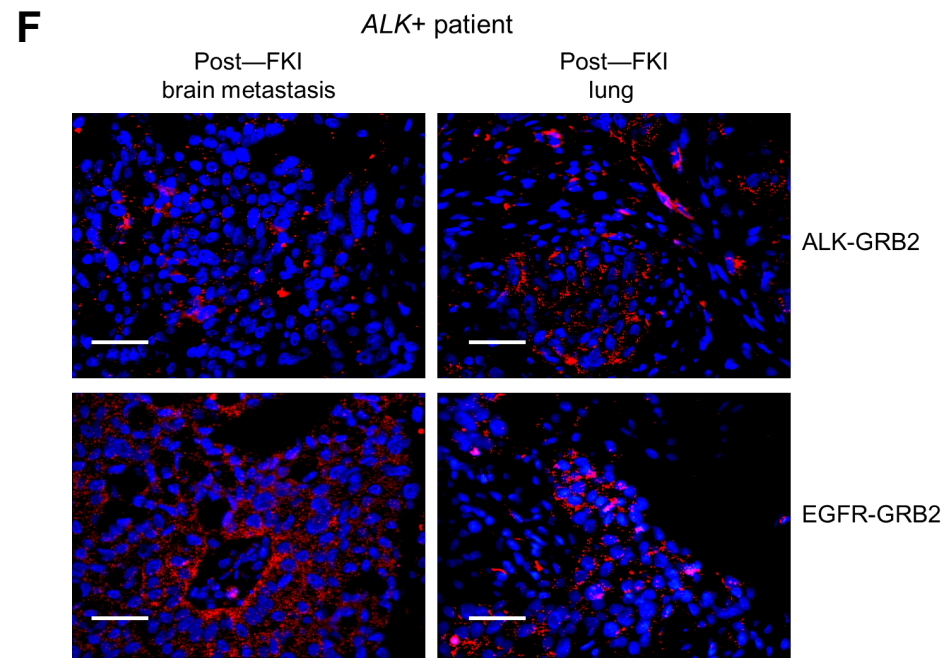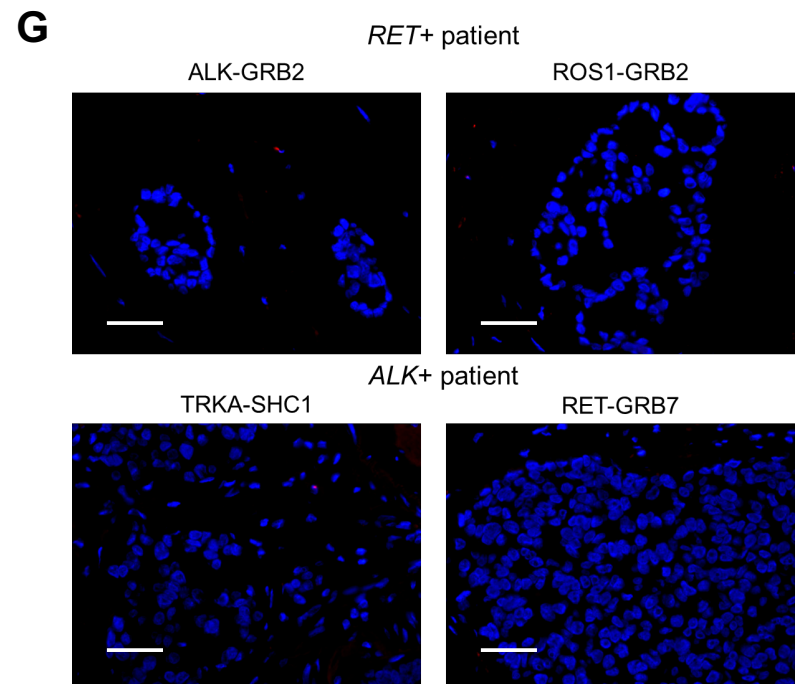

Supplement: NIHMS870546-supplement-2.pdf [file NIHMS870546-supplement-2.pdf]
